# Supplementary material for: Self-assembly of β-d glucose-stabilized Pt nanocrystals into nanowire-like structures
Source: Royal Society of Chemistry journal article supplement (doi:10.1039/b502342d), 2005-01-01
Supplement: b502342d.pdf [file b502342d.pdf]

## Electronic Supporting Information

### Self-assembly of $\beta$ -D glucose-stabilized Pt Nanocrystals into Nanowire-like Structures

Juncheng Liu\*<sup>a, b</sup>, Poovathinthodiyil Raveendran<sup>a</sup>, Gaowu Qin,<sup>a</sup> Yukata Ikushima\*<sup>a</sup>

<sup>a</sup> Tohoku Center, National Institute of Advanced Industrial Science and Technology, 4-2-1 Nigatake, Miyagino-ku, Sendai  
983-8551, Japan.

<sup>b</sup> Department of Chemical Engineering, Auburn University, Auburn, Alabama 36849, USA

\*Corresponding authors:

Yukata Ikushima

E-mail: y-ikushima@aist.go.jp, Tel: +81-022-237-5211, Fax: +81-022-232-7002.

Juncheng Liu

E-mail: liu.sam@eng.auburn.edu, Tel: (334) 844-2067, Fax: (334) 844-2063.

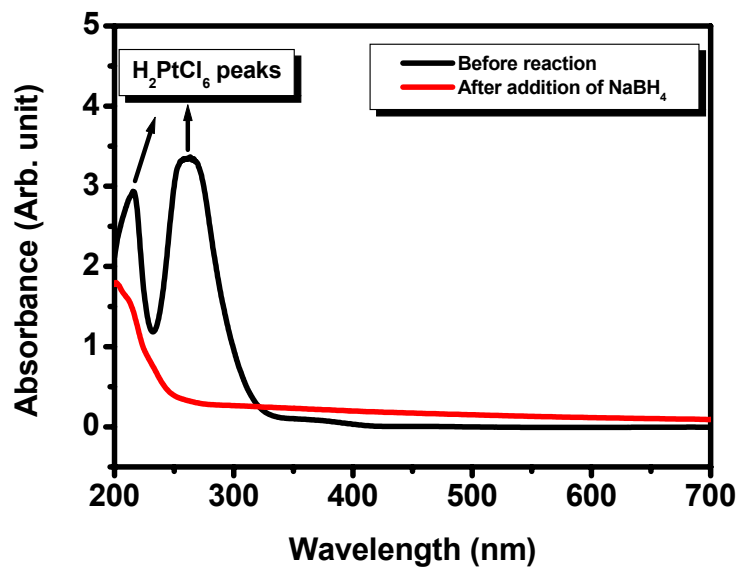

Figure S1. UV absorption spectra before and after the reduction reaction in aqueous  $\beta$ -D glucose dispersion (pH = 7.7)

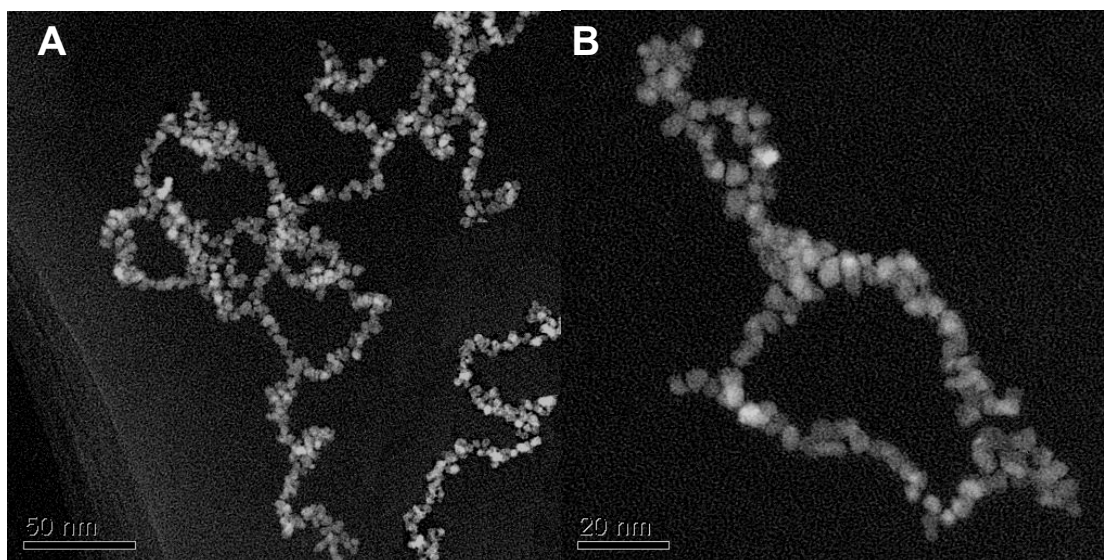

Figure S2. Representative TEM images of the Pt nanowire-like assemblies stabilized and structured-directed by  $\beta$ -D glucose (scale bar: (A) 50nm, (B) 20nm )
